# Supplementary material for: Selectivity mechanism of BCL-XL/2 inhibition through in silico investigation
Source: Royal Society of Chemistry journal article supplement (doi:10.1039/d2cp01755e), 2022-01-01
Supplement: d2cp01755e1.pdf [file d2cp01755e1.pdf]

## Supplementary Material

### Selectivity mechanism of BCL-XL/2 inhibition through *in silico* investigation

Jiasi Luan<sup>a,b,c</sup>, Baichun Hu<sup>a,b,d</sup>, Shizhun Wang<sup>a,b,e</sup>, Haihan Liu<sup>a,b,e</sup>, Shuaizhong Lu<sup>a,b,e</sup>,  
Weixia Li<sup>a,b,e</sup>, Xizhe Sun<sup>d</sup>, Jiyue Shi<sup>a,b,e</sup>, Jian Wang<sup>a,b,e\*</sup>

*a* Key Laboratory of Structure-Based Drug Design & Discovery of Ministry of Education, Shenyang Pharmaceutical University, Shenyang 110016, People's Republic of China

*b* Key Laboratory of Intelligent Drug Design and New Drug Discovery of Liaoning Province, Shenyang Pharmaceutical University, Shenyang 110016, China

*c* School of Medical Devices, Shenyang Pharmaceutical University, Shenyang 110016, People's Republic of China

*d* School of Pharmacy, Shenyang Pharmaceutical University, Shenyang 110016, People's Republic of China

*e* School of Pharmaceutical Engineering, Shenyang Pharmaceutical University, Shenyang 110016, People's Republic of China

Corresponding author: Prof. Jian Wang, E-mail: [jianwang@sypu.edu.cn](mailto:jianwang@sypu.edu.cn).

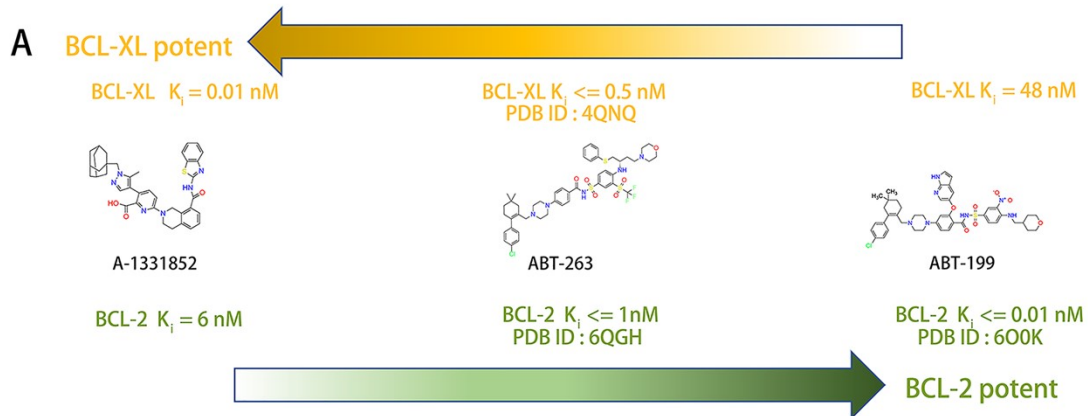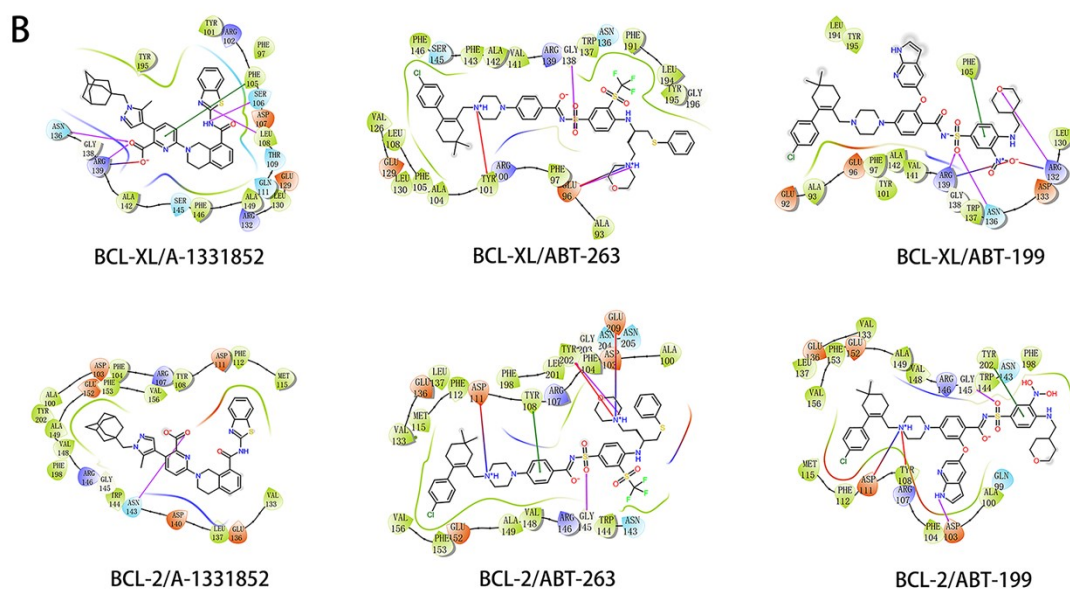

**Figure S1** Comparison of proteins and inhibitors. (A) Structures of BCL-XL and BCL-2 inhibitors. (B) Ligand interaction diagram.
