# Supplementary material for: Selectivity mechanism of BCL-XL/2 inhibition through in silico investigation
Source: Royal Society of Chemistry journal article supplement (doi:10.1039/d2cp01755e), 2022-01-01
Supplement: d2cp01755e3.pdf [file d2cp01755e3.pdf]

**A** BCL-XL potent

BCL-XL  $K_i = 0.01$  nM

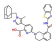

A-1331852

BCL-2  $K_i = 6$  nM

BCL-XL  $K_i \leq 0.5$  nM  
PDB ID: 4QNG

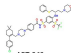

ABT-263

BCL-2  $K_i \leq 1$  nM  
PDB ID: 6QGH

BCL-XL  $K_i = 48$  nM

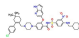

ABT-199

BCL-2  $K_i \leq 0.01$  nM  
PDB ID: 6O0K

BCL-2 potent

**B**

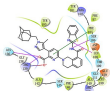

BCL-XL/A-1331852

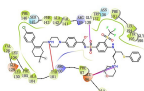

BCL-XL/ABT-263

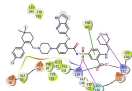

BCL-XL/ABT-199

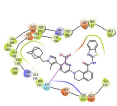

BCL-2/A-1331852

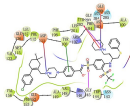

BCL-2/ABT-263

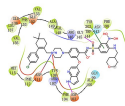

BCL-2/ABT-199
